# Supplementary material for: Detailed Analysis of a Contiguous 22-Mb Region of the Maize Genome
Source: PLoS Genet. 2009 Nov 20;5(11):e1000728. doi: 10.1371/journal.pgen.1000728 (PMC2773423; doi:10.1371/journal.pgen.1000728)
Supplement: Table S2 — The sequenced BAC clone list in AR182. (0.11 MB XLS) [file pgen.1000728.s016.xls]

## Sheet: Sheet1
Table S2. The sequenced BAC clone list in AR182.
Clone		Position		GenBank
	Contig	From	To	Accession
ZMMBBc0274I24	182	2	35	AC190588
ZMMBBc0098E04	182	44	70	AC185658
ZMMBBc0171P20	182	75	98	AC188728
ZMMBBc0339C13	182	87	121	AC185449
ZMMBBc0347G01	182	117	157	AC185651
ZMMBBb0436O23	182	152	181	AC184697
ZMMBBc0182F03	182	169	201	AC185484
ZMMBBb0092L01	182	195	220	AC186151
ZMMBBc0146A08	182	241	280	AC186531
ZMMBBc0150D14	182	260	299	AC196429
ZMMBBc0118J13	182	266	307	AC185521
ZMMBBc0272M16	182	294	333	AC185469
ZMMBBc0316N15	182	319	355	AC187827
ZMMBBc0149N13	182	351	391	AC186165
ZMMBBc0422N23	182	380	NA	AC197009
ZMMBBc0130K19	182	384	422	AC190989
ZMMBBc0344C02	182	415	454	AC185654
ZMMBBb0326A13	182	466	495	AC190749
ZMMBBc0155O12	182	481	518	AC184785
ZMMBBb0226P07	182	506	534	AC195681
ZMMBBc0322G16	182	523	551	AC185454
ZMMBBc0022K10	182	551	586	AC188746
ZMMBBc0021C19	182	597	633	AC195796
ZMMBBc0422D14	182	623	665	AC185226
ZMMBBb0230N18	182	651	680	AC190657
ZMMBBc0194L16	182	652	685	AC207477
ZMMBBc0287I22	182	676	714	AC186147
ZMMBBb0192E18	182	711	744	AC189677
ZMMBBc0383L02	182	741	773	AC187553
ZMMBBc0025H11	182	766	797	AC185664
ZMMBBc0479L04	182	792	832	AC190964
ZMMBBc0380P13	182	826	869	AC186512
ZMMBBc0173P12	182	852	884	AC185663
ZMMBBc0321K16	182	874	905	AC185504
ZMMBBc0160N22	182	895	927	AC194943
ZMMBBc0193K13	182	925	960	AC191579
ZMMBBc0045N08	182	949	989	AC194256
ZMMBBc0364A10	182	971	1003	AC185649
ZMMBBc0299E20	182	1007	1036	AC186142
ZMMBBc0418J16	182	1032	1067	AC185642
ZMMBBb0197G04	182	1070	1092	AC190638
ZMMBBc0076C16	182	1087	1123	AC185660
ZMMBBc0500P17	182	1109	1156	AC194012
ZMMBBb0341M17	182	1124	1160	AC197048
ZMMBBb0147M17	182	1156	1198	AC189046
ZMMBBc0039O13	182	1171	1219	AC195979
ZMMBBc0368N13	182	1210	NA	AC186014
ZMMBBc0123L20	182	1220	1262	AC186021
ZMMBBc0326E22	182	1239	1271	AC194188
ZMMBBc0080H14	182	1256	1285	AC187915
ZMMBBc0189P15	182	1285	1325	AC182825
ZMMBBc0049O20	182	1307	1347	AC185659
ZMMBBb0621B19	182	1330	1363	AC190536
ZMMBBc0191P02	182	1360	NA	AC190832
ZMMBBc0174I02	182	1382	1409	AC194418
ZMMBBc0321F04	182	1407	1442	AC185457
ZMMBBb0637N19	182	1438	1468	AC193333
ZMMBBc0266M17	182	1468	1498	AC185471
ZMMBBc0235H14	182	1486	1518	AC185474
ZMMBBb0394E21	182	1512	1545	AC203967
ZMMBBc0436C04	182	1548	1576	AC185633
ZMMBBc0426J19	182	1570	NA	AC185637
ZMMBBc0333D10	182	1600	1632	AC185271
ZMMBBc0155J05	182	1620	1647	AC187557
ZMMBBc0143P20	182	1638	1674	AC196724
ZMMBBc0395N20	182	1652	1687	AC185646
ZMMBBc0004G02	182	1679	1727	AC186317
ZMMBBc0029G01	182	1710	1747	AC186016
ZMMBBc0339F04	182	1733	1769	AC185123
ZMMBBb0020K18	182	1770	1786	AC186159
ZMMBBc0422E14	182	1780	NA	AC185640
ZMMBBc0257M04	182	1805	1845	AC190654
ZMMBBc0238O23	182	1835	1869	AC185475
ZMMBBc0187D12	182	1842	1885	AC185485
ZMMBBc0421E12	182	1879	1915	AC185639
ZMMBBc0183J21	182	1902	1933	AC182834
ZMMBBc0454N10	182	1941	1974	AC185634
ZMMBBc0126O15	182	1967	2002	AC191587
ZMMBBc0149J10	182	1984	2023	AC196183
ZMMBBc0510A18	182	2012	2046	AC185624
ZMMBBc0001A01	182	2043	2078	AC194345
ZMMBBc0213B10	182	2070	NA	AC201917
ZMMBBc0323B04	182	2107	2146	AC185455
ZMMBBc0087E18	182	2139	2186	AC185966
ZMMBBc0167G13	182	2160	NA	AC190674
ZMMBBb0345A18	182	2201	2231	AC190761
ZMMBBc0162H05	182	2220	2253	AC187909
ZMMBBc0126H04	182	2256	2294	AC205079
ZMMBBc0014D14	182	2282	2320	AC185666
ZMMBBc0392F01	182	2304	2335	AC185647
ZMMBBb0592O14	182	2317	2346	AC189706
ZMMBBc0216J18	182	2337	2374	AC185476
ZMMBBc0188M16	182	2366	2402	AC182827
ZMMBBc0194C09	182	2391	2426	AC185480
ZMMBBc0469N05	182	2418	2449	AC186507
ZMMBBc0435B16	182	2440	2476	AC185635
ZMMBBb0216C17	182	2482	2509	AC186160
ZMMBBc0191I23	182	2519	2553	AC189280
ZMMBBc0266D07	182	2562	2590	AC185470
ZMMBBc0409A15	182	2585	NA	AC194085
ZMMBBb0048D19	182	2589	2609	AC195837
ZMMBBb0129C09	182	2613	2637	AC189277
ZMMBBc0381P07	182	2643	2676	AC185650
ZMMBBb0276E01	182	2668	2695	AC187479
ZMMBBc0256F05	182	2690	2729	AC182823
ZMMBBb0305F12	182	2750	2774	AC186156
ZMMBBc0173P04	182	2772	2792	AC186017
ZMMBBc0504F15	182	2782	2821	AC190940
ZMMBBc0130A10	182	2810	2848	AC185670
ZMMBBc0527B07	182	2843	2873	AC185619
ZMMBBc0415A15	182	2868	2900	AC188007
ZMMBBc0008A12	182	2891	2928	AC200065
ZMMBBc0393M14	182	2924	2952	AC185645
ZMMBBc0199E14	182	2949	2980	AC185481
ZMMBBc0208J13	182	2970	2999	AC186287
ZMMBBc0546M05	182	2996	3027	AC195990
ZMMBBb0476C09	182	3011	3040	AC195404
ZMMBBc0143O24	182	3030	3070	AC207458
ZMMBBb0218P21	182	3065	3095	AC186157
ZMMBBc0393D03	182	3082	3125	AC185648
ZMMBBc0287F07	182	3110	3148	AC185503
ZMMBBc0452P10	182	3141	3175	AC186323
ZMMBBc0523C19	182	3170	3195	AC185621
ZMMBBc0342O08	182	3187	3216	AC185653
ZMMBBb0255F08	182	3195	3220	AC190679
ZMMBBc0137B12	182	3210	3236	AC185665
ZMMBBc0541N01	182	3230	3260	AC204383
ZMMBBc0131B19	182	3254	3287	AC185667
ZMMBBc0219A18	182	3273	3318	AC196484
ZMMBBc0170G01	182	3292	3332	AC186020
ZMMBBc0401F20	182	3330	NA	AC185643
ZMMBBc0123G08	182	3346	3378	AC207079
ZMMBBc0480C01	182	3363	3402	AC196365
ZMMBBc0490P18	182	3370	NA	AC185626
ZMMBBc0027A17	182	3377	3416	AC186015
ZMMBBc0212M06	182	3404	3441	AC196368
ZMMBBc0127F20	182	3427	3467	AC191759
ZMMBBc0524A08	182	3451	3490	AC185622
ZMMBBb0634P18	182	3488	3525	AC186563
ZMMBBc0307F08	182	3507	3544	AC187917
ZMMBBb0324M08	182	3538	3570	AC186153
ZMMBBc0132N19	182	3568	3596	AC185668
ZMMBBc0323J10	182	3598	3631	AC185501
ZMMBBc0106D17	182	3624	3657	AC194980
ZMMBBc0170K12	182	3655	3687	AC183414
ZMMBBc0184P01	182	3680	NA	AC195780
ZMMBBc0040P07	182	3710	3744	AC185662
ZMMBBc0470L12	182	3733	3770	AC185629
ZMMBBc0480K16	182	3761	3794	AC185625
ZMMBBc0021J08	182	3796	3830	AC199786
ZMMBBc0251O11	182	3815	3846	AC183914
ZMMBBb0334O09	182	3838	3872	AC190751
ZMMBBc0137N22	182	3870	NA	AC200420
ZMMBBc0475F02	182	3894	3935	AC185630
ZMMBBb0166M11	182	3926	3949	AC190594
ZMMBBc0349K08	182	3940	NA	AC185652
ZMMBBc0303B20	182	3957	3985	AC185463
ZMMBBc0360K20	182	3988	4018	AC185225
ZMMBBb0209C20	182	4015	4037	AC190640
ZMMBBc0477M05	182	4028	4061	AC185627
ZMMBBb0468G20	182	4056	4081	AC190860
ZMMBBc0274H05	182	4076	4115	AC185467
ZMMBBc0433K22	182	4108	4140	AC185638
ZMMBBc0111C04	182	4129	4152	AC197274
ZMMBBb0309H21	182	4163	4190	AC191807
ZMMBBb0532G08	182	4176	4202	AC188844
ZMMBBc0310I05	182	4214	4244	AC185456
ZMMBBc0212E22	182	4242	4277	AC185479
ZMMBBc0337K02	182	4264	4290	AC186143
ZMMBBc0022J24	182	4283	4314	AC186018
ZMMBBb0099B24	182	4307	4344	AC186152
ZMMBBc0162B11	182	4337	4372	AC184144
ZMMBBc0203H03	182	4366	4399	AC185478
ZMMBBc0273N02	182	4393	4424	AC185466
ZMMBBb0188G22	182	4420	4448	AC190628
ZMMBBc0038F12	182	4455	4483	AC185661
